# Supplementary material for: Monitoring calcium handling by the plant endoplasmic reticulum with a low‐Ca2+‐affinity targeted aequorin reporter
Source: PubMed Central journal article supplement (PMC9299891; doi:10.1111/tpj.15610), 2021-12-11

(a) Bacterial elicitor

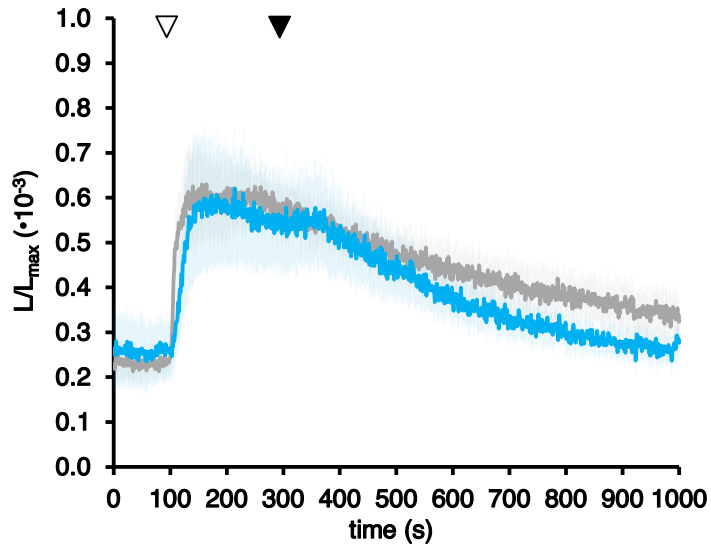

(b) Fungal symbiotic signal

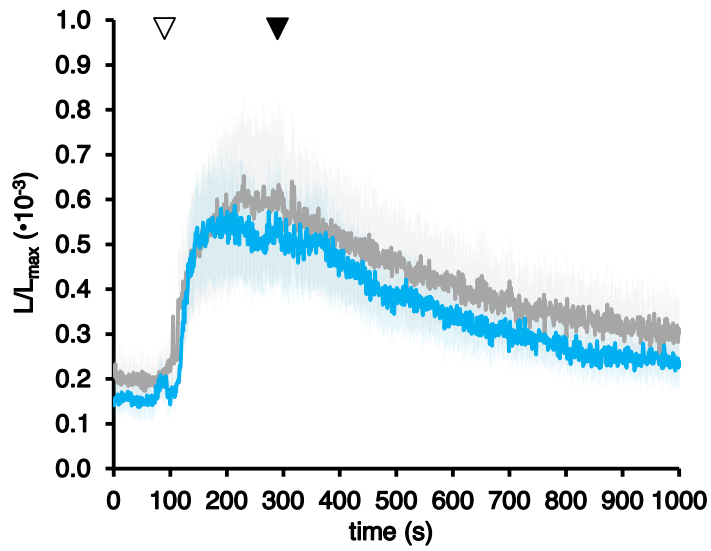

(c) Plant cell wall-derived elicitor

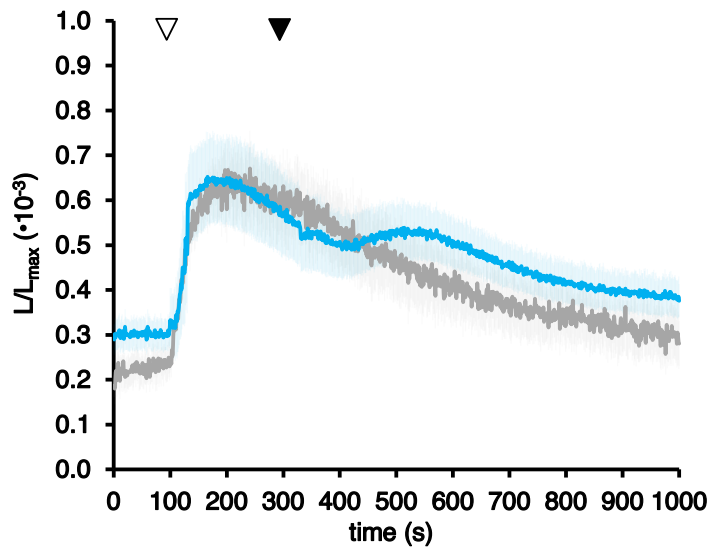

Supplement: TPJ-109-1014-s005.pdf [file TPJ-109-1014-s005.pdf]
