# Supplementary material for: Monitoring calcium handling by the plant endoplasmic reticulum with a low‐Ca2+‐affinity targeted aequorin reporter
Source: PubMed Central journal article supplement (PMC9299891; doi:10.1111/tpj.15610), 2021-12-11
Supplement: TPJ-109-1014-s010.pdf [file TPJ-109-1014-s010.pdf]

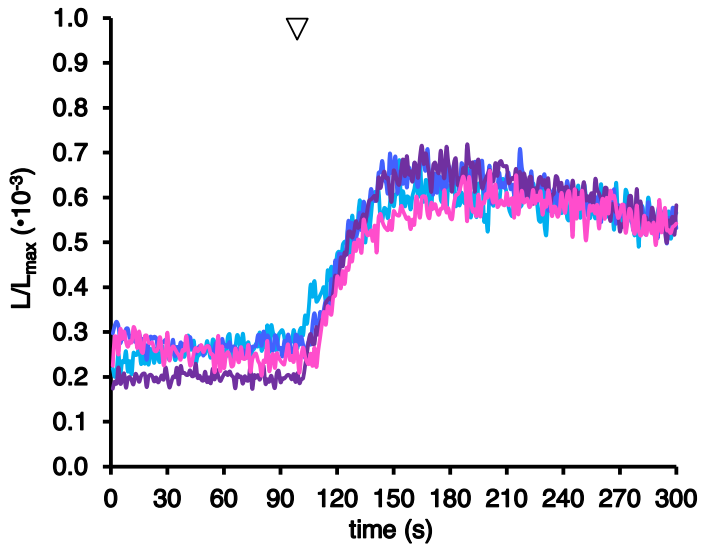

$\text{CaCl}_2$ : 1 mM 2 mM 5 mM 10 mM
